# Supplementary material for: Reconstructing high-dimensional two-photon entangled states via compressive sensing
Source: PubMed Central journal article supplement (PMC4194436; doi:10.1038/srep06542), 2014-10-13
Supplement: srep06542-s1.pdf [file srep06542-s1.pdf]

# Reconstructing high-dimensional two-photon entangled states via compressive sensing

Francesco Tonolini<sup>1</sup>, Susan Chan<sup>1</sup>, Megan Agnew<sup>1,2</sup>, Alan Lindsay<sup>1,2</sup>, Jonathan Leach<sup>1,\*</sup>  
<sup>1</sup>*SUPA, School of Engineering and Physical Sciences, Heriot-Watt University, Edinburgh EH14 4AS, UK*  
<sup>2</sup>*Applied and Computational Mathematics and Statistics, University of Notre Dame, USA and*  
<sup>\*</sup> *j.leach@hw.ac.uk*

## SUPPLEMENTARY MATERIALS

### Algorithm Schematics

**Input:** Matrix of measurements  $A \in \mathbb{C}^{M \times N}$ , vector of normalised probabilities  $\vec{p}$ , initial guess matrix  $\hat{\rho}_{in}$ , SVD threshold parameter  $\tau$  such that  $0 < \tau < 1$ , sparsity parameter  $\tau_\ell$  such that  $0 < \tau_\ell < 1$  and stopping condition step size  $\delta_s$ . In our 17-dimensional state reconstruction we choose  $\tau = 0.4$ ,  $\tau_\ell = 0.04$  and  $\delta_s = |\vec{\rho}_s| \cdot 10^{-3}$ .

**Output:** Recovered matrix  $\hat{\rho}_d$

1. Set  $A' = orth(A)$  and  $\vec{p}' = C\vec{p}$  where  $CA = A'$
2. Set  $\hat{\rho}_{s,0} = \hat{\rho}_{in}$
3. **For**  $k = 1 : k_{max}$
4.     Set  $\hat{\rho}_{0,k} = \Gamma_{\tau,\tau_\ell}(\hat{\rho}_{s,k-1})$
5.     Set  $\vec{\rho}_{0,k} = vec(\hat{\rho}_{0,k})$
6.     **For**  $i=1:M$
7.         Set  $A_i = i_{th}$  row of  $A$
8.         Set  $\vec{\rho}_i = P(\vec{\rho}_{i-1}, A_i)$
9.     **End**
10.     Set  $\hat{\rho}_{s,k} = mat(\vec{\rho}_M)$
11.     Set  $\delta = |\hat{\rho}_{s,k} - \hat{\rho}_{s,k-1}|$
12.     **If**  $\delta \leq \delta_s$  **Break**
13. **End**

Here  $orth(\cdot)$  is the orthogonalizing operator,  $\Gamma_{\tau,\tau_\ell}(\cdot)$  is the operator that enforces the desired characteristics described in the results section,  $vec(\cdot)$  is the operator that rearranges the elements of a matrix into a vector,  $P(v, V)$  denotes the projection of a vector  $v$  onto a hyperplane having normal  $V$ , and  $mat(\cdot)$  is the operator that rearranges the elements of a vector into a square matrix.

### Projection onto a hyperplane

To project a point  $\vec{\rho}_{i-1}$  onto a hyperplane  $A'_i\vec{\rho} = p'_i$ , it is necessary to find the vector  $\vec{v}_i$  that has direction  $\vec{n}_i$  normal to the hyperplane  $A'_i\vec{\rho} = p'_i$  and size  $k_i$ , where  $k_i$  is

$$k_i = p'_i - \langle \vec{n}_i | \vec{\rho}_{i-1} \rangle. \quad (1)$$

The desired projection  $\vec{\rho}_i$  is then

$$\vec{\rho}_i = \vec{\rho}_{i-1} + \vec{v}_i. \quad (2)$$

### Finding and correcting $\Delta\vec{\rho}$

The error vector  $\Delta\vec{\rho}$  depends on the experimental error  $\Delta p_i$  associated with each of the probabilities and the measurements made to perform the reconstruction. Instead of extending the search to a non-linear space, we make use of the low rank and sparsity information to estimate the error direction, that is, to find a close approximation for the vector  $\Delta\vec{\rho} = \vec{\rho}_r - \vec{\rho}_d$ , where  $\vec{\rho}_r$  is the projection of  $\vec{\rho}_d$  onto the linear space intersection of all the hyperplanes. In order to do this we divide the measurements and the corresponding probabilities in subsets  $A_{s_i}$  and  $\vec{p}_{s_i}$  of sufficient size for our compressive sensing technique to yield convergence to a solution (the size of the subsets depends on the purity of the state and the estimate of the error  $\Delta p_i$  on each of the probabilities). We then perform the operation-projection algorithm on each subset separately to find the vectors  $\vec{\rho}_{s_i}$ , low rank and sparse solutions to the corresponding subsets systems  $A_{s_i}\vec{\rho} = \vec{p}_{s_i}$ . We hence define a new set of vectors  $\Delta\vec{\rho}_i = \vec{\rho}_{s_i} - \vec{\rho}_{d_i}$  where  $\vec{\rho}_{d_i}$  is the solution resulting from applying one last set of thresholding operations to  $\vec{\rho}_{s_i}$ . The sum of the vectors  $\Delta\vec{\rho}_i$  is taken as a close approximation for the error vector  $\Delta\vec{\rho}$ . We finally compute a correction vector for the probabilities  $\Delta p$  that can be subtracted from the measured probabilities  $p$ . The correction vector is defined as

$$\Delta p = A\Delta\vec{\rho}. \quad (3)$$

Once the probabilities have been corrected as described above, the compressive sensing algorithm can be performed, making use of the set of performed measurements  $A$  and the corrected probabilities  $p - \Delta p$ .
